# Supplementary material for: Elucidating the biotechnological potential of the genera Parageobacillus and Saccharococcus through comparative genomic and pan-genome analysis
Source: Research Square preprint supplement (doi:10.21203/rs.3.rs-3971938/v1), 2024-02-29
Supplement: Supplementary file 1 [file aad6089e553940fa898f76af.xlsx]

## Sheet: Parasac_genome_data
Organism Name	Strain	Assembly Accession	Bioporject	Biosample	Assembly Level	WGS project accession	Isolation source	Country	BUSCO completeness (%)	# contigs/replicons	Genome size (Mb)	G+C content (%)	# proteins	Plasmids	% genome/plasmid	%proteins/plasmid	Phage elements (intact/incomplete)	% phages/genome	% phage proteins/genome
Parageobacillus thermantarcticus	DSM 9572T	GCA_900111865.1	PRJEB17059	SAMN05192569	Scaffold	FOJS01	Geothermal soil	Antarctica	99.1	9	3.445	43.67	3497	1	1.67	0.857878	6 (2/4)	4.18905	6.40549
Parageobacillus thermoglucosidasius	23.6	GCA_024509915.1	PRJNA668107	SAMN16397577	Complete Genome	CP063414.1-CP063417.1	Soil	Spain	99.1	3	4.024	43.69	3944	2	3.81	4.31034	4 (1/3)	2.75112	3.34686
Parageobacillus thermoglucosidasius	B4168	GCA_001587555.1	PRJNA270597	SAMN03267297	Contig	LQYU01	Dairy product	Netherlands	99.1	1	3.737	43.85	3686	-	0	0	1 (1/0)	1.91316	1.79056
Parageobacillus thermoglucosidasius	BH4-1	GCA_022846475.1	PRJDB12551	SAMD00442892	Complete Genome	AP025621.1-AP025622.1	Non-contaminated soil	Japan	99.1	2	3.892	43.88	3762	1	2.4	2.49867	1 (0/1)	0.565221	0.558214
Parageobacillus thermoglucosidasius	C56-YS93	GCA_000178395.2	PRJNA40781	SAMN02232024	Complete Genome	CP002835.1-CP002837.1	Hot Spring	USA	99.1	3	3.994	43.93	3944	2	2.52	2.40872	6 (1/5)	2.35616	3.21926
Parageobacillus thermoglucosidasius	DSM 2542T	GCA_001295365.1	PRJNA296418	SAMN04099008	Complete Genome	CP012712.1	Soil	Japan	98.6	3	3.98	43.84	3863	2	3.07	3.44292	3 (1/2)	2.30153	3.5479
Parageobacillus thermoglucosidasius	DSM 2543	GCA_014218625.1	PRJNA482718	SAMN09711376	Contig	QQOJ01	Soil	Japan	99.1	5	3.962	43.8	3863	2	3.2	3.46881	6 (0/6)	1.37697	1.68263
Parageobacillus thermoglucosidasius	DSM 6285	GCA_014218645.1	PRJNA482719	SAMN09711377	Contig	QQOK01	River sediment	USA	99.1	9	3.968	43.58	3868	1	1.77	1.83557	7 (0/7)	1.58266	1.99327
Parageobacillus thermoglucosidasius	DSM 21625	GCA_014218665.1	PRJNA482720	SAMN09711378	Contig	QQOL01	Flax plants	Germany	99.1	22	4.006	43.83	3946	2	2.32	2.20476	1 (0/1)	0.284798	0.41365
Parageobacillus thermoglucosidasius	G08C001	SRX1619421	PRJNA311332	SAMN04549607	Contig	SRX1619421	Soil	USA	99.1	14	3.858	43.83	3779	2	2.69	2.75205	2 (0/2)	1.2001	1.34956
Parageobacillus thermoglucosidasius	GT23	GCA_001651535.1	PRJNA314192	SAMN04532072	Scaffold	LUCT01	Casein pipeline	Netherlands	99.1	1	3.694	43.8	3661	-	0	0	1 (1/0)	1.92726	1.80279
Parageobacillus thermoglucosidasius	NCIMB 11955	GCA_001700985.1	PRJNA330787	SAMN05416582	Complete Genome	CP016622.1-CP016624.1	TMO Renewables	United Kingdom	98.9	3	3.989	43.83	3871	2	3.3	3.53914	6 (0/6)	1.37366	1.67915
Parageobacillus thermoglucosidasius	TG4	GCA_003865195.2	PRJDB7652	SAMD00150856	Scaffold	BHZK01	Marine sediment	Japan	99.1	3	3.945	43.93	3878	1	2.4	2.37236	2 (1/1)	1.71124	2.26921
Parageobacillus thermoglucosidasius	TNO-09.020	GCA_000258725.1	PRJNA81577	SAMN02471215	Chromosome	AJJN01	Dairy factory biofilm	Netherlands	99.1	1	3.773	43.96	3701	-	0	0	1 (1/0)	1.81795	1.70224
Parageobacillus thermoglucosidasius	Y4.1MC1	GCA_000166075.1	PRJNA33183	SAMN00002562	Complete Genome	CP002293.1-CP002294.1	Hot Spring	USA	99.3	2	3.912	44.01	3817	1	1.83	1.8601	2 (1/1)	1.96322	2.64606
Parageobacillus toebii	44C	GCA_014679925.1	PRJNA354604	SAMN06347029	Complete Genome	CP061475.1	Gold mine shaft	USA	99.1	2	3.336	42.53	3308	1	1.43	1.4208	3 (1/2)	1.81057	2.08585
Parageobacillus toebii	B4110	GCA_001587455.1	PRJNA270597	SAMN03267295	Scaffold	LQYW01	Pea soup	Netherlands	99.5	9	3.526	42.16	3548	1	1.68	1.66291	3 (1/2)	2.32552	2.53664
Parageobacillus toebii	DSM 14590T	GCA_003688615.2	PRJNA455457	SAMN09062732	Complete Genome	CP049703.1-CP049704.1	Hay compost	Korea	98	2	3.323	42.36	3281	1	1.59	1.92015	2 (0/2)	0.800467	0.731484
Parageobacillus toebii	DSM 18751	GCA_002217735.1	PRJNA383662	SAMN06770004	Contig	NDYL01	Compost	Italy	99.6	4	3.796	41.58	3816	-	0	0	7 (0/7)	2.75564	3.3805
Parageobacillus toebii	E263	GCA_007197795.1	PRJNA553850	SAMN12252226	Complete Genome	CP041632.1	Deep-sea hydrothermal vent	China	99.3	1	3.478	42.61	3397	-	0	0	4 (0/4)	1.56869	1.41301
Parageobacillus toebii	NEB718	GCA_016939435.1	PRJNA622823	SAMN17843211	Complete Genome	CP070511.1-CP070513.1	-	-	99.1	3	3.456	42.22	3441	2	1.56	1.71462	3 (0/3)	1.87188	2.1796
Parageobacillus toebii	WCH70	GCA_000023385.1	SAMN00000635	SAMN00000635	Complete Genome	CP001638.1-CP001640.1	Compost	USA	99.8	3	3.509	42.8	3433	2	1.26	1.54384	4 (0/4)	1.02029	0.873871
Parageobacillus genomosp. nov. A	W-2	GCA_001655645.1	PRJNA320062	SAMN04915186	Contig	LXMA01	Oil reservoir	China	99.8	11	3.899	43.15	3882	1	2.03	1.77743	8 (3/5)	5.79141	6.28542
Parageobacillus genomosp. nov. A	KH3-4	GCA_022846435.1	PRJDB12551	SAMD00442693	Complete Genome	AP025627.1	Non-contaminated soil	Japan	99.8	1	3.817	43.41	3725	-	0	0	4 (0/4)	2.38935	2.73826
Saccharococcus caldoxylosilyticus	44B	GCA_014680125.1	PRJNA662697	SAMN06347028	Complete Genome	CP061476.1	Gold mine shaft	USA	99.4	1	3.774	44.27	3698	-	0	0	4 (0/4)	0.731344	0.811249
Saccharococcus caldoxylosilyticus	B4119	GCA_001587505.1	PRJNA270597	SAMN03267290	Scaffold	LQYS01	Dairy product	Netherlands	100	18	3.943	44.02	3986	3	3.23	3.31159	4 (2/2)	2.80013	3.48721
Saccharococcus caldoxylosilyticus	CIC9	GCA_000313345.1	PRJNA175758	SAMN02470176	Contig	AMRO01	Hot Spring	Indonesia	100	4	3.824	44.18	3757	-	0	0	2 (1/1)	1.83837	2.23583
Saccharococcus caldoxylosilyticus	DSM 12041T	GCA_014196025.1	PRJNA583512	SAMN13173495	Scaffold	JACICX01	Soil	Australia	99.3	22	3.854	44.12	3764	1	1.5	1.85972	2 (0/2)	1.26882	0.743889
Saccharococcus caldoxylosilyticus	ER4B	GCA_019272935.1	PRJNA344835	SAMN06209283	Complete Genome	CP040553.1-CP040554.1	Compost	Malaysia	99.8	2	3.912	44.32	3863	1	1.39	1.50142	2 (1/1)	1.88929	2.43334
Saccharococcus caldoxylosilyticus	KH1-5	GCA_022846395.1	PRJDB12551	SAMD00442691	Complete Genome	AP025623.1	Non-contaminated soil	Japan	100	1	3.851	44.32	3783	-	0	0	3 (0/3)	1.10051	0.898758
Saccharococcus caldoxylosilyticus	KH1-6	GCA_022846415.1	PRJDB12551	SAMD00442692	Complete Genome	AP025624.1	Non-contaminated soil	Japan	100	1	3.851	44.32	3782	-	0	0	3 (0/3)	1.10108	0.898995
Saccharococcus caldoxylosilyticus	KH3-5	GCA_022846455.1	PRJDB12551	SAMD00442694	Complete Genome	AP025625.1-AP025626.1	Non-contaminated soil	Japan	100	2	3.839	44.19	3753	1	0.18	0.266454	1 (0/1)	0.307358	0.266454
Saccharococcus caldoxylosilyticus	VR-IP	GCA_013357975.1	PRJNA637488	SAMN15143704	Scaffold	JABVYQ01	Iron particles from steam vent	India	99.8	2	3.823	44.04	3809	1	1.15	1.49646	4 (1/3)	4.27942	4.54187
Saccharococcus genomosp. nov. A	NUB3621	GCA_000632515.1	PRJNA189971	SAMN02727286	Chromosome	AOTZ01	Soil	China	99.8	6	3.626	44.4	3637	-	0	0	1 (0/1)	0.934546	0.972447
Saccharococcus thermophilus	DSM 4749T	GCA_011761475.1	PRJNA332068	SAMN05444710	Contig	JAASRS01	Sugar beet extraction	Sweden	99.6	3	3.135	44.9	3085	2	2.6	2.62561	3 (1/2)	3.29309	4.50921
Geobacillus thermodenitrificans	DSM 465T	GCA_002072065.1	PRJNA347632	SAMN05894115	Complete Genome	CP017694.1	Sugar beet juice	Austria	99.3	1	3.473	49.13	3384	-	0	0	2 (2/0)	2.28615	3.33924
